# Supplementary material
Source: publisher site journal article supplement (http://kjim.org/upload/media/kjim-2020-652-suppl1.pdf)
Supplement: Supplementary file 1 [file kjim-2020-652-suppl1.pdf]

**Supplementary Table 1. Composition of 50-item CGA-FI in this study**

|                                                                                                                                       |
|---------------------------------------------------------------------------------------------------------------------------------------|
| Hypertension (yes, 1; no, 0)                                                                                                          |
| Diabetes mellitus (yes, 1; no, 0)                                                                                                     |
| Chronic kidney disease (yes, 1; no, 0)                                                                                                |
| Atrial fibrillation (yes, 1; no, 0)                                                                                                   |
| Angina pectoris (yes, 1; no, 0)                                                                                                       |
| History of myocardial infarction (yes, 1; no, 0)                                                                                      |
| Congestive heart failure (yes, 1; no, 0)                                                                                              |
| Peripheral artery disease (yes, 1; no, 0)                                                                                             |
| Chronic obstructive pulmonary disease (yes, 1; no, 0)                                                                                 |
| Cerebral artery disease (yes, 1; no, 0)                                                                                               |
| History of stroke (yes, 1; no, 0)                                                                                                     |
| Dementia (yes, 1; no, 0)                                                                                                              |
| Sensory impairment (yes, 1; no, 0)                                                                                                    |
| Depression (yes, 1; no, 0)                                                                                                            |
| Anxiety disorder (yes, 1; no, 0)                                                                                                      |
| Malignant disease (yes, 1; no, 0)                                                                                                     |
| Arthritis (yes, 1; no, 0)                                                                                                             |
| Spinal disease (yes, 1; no, 0)                                                                                                        |
| Asthma (yes, 1; no, 0)                                                                                                                |
| Fall history in previous 1 year (yes, 1; no, 0)                                                                                       |
| Polypharmacy (5 or more medications; yes, 1; no, 0)                                                                                   |
| Weight loss > 4.5 kg for previous 1 year (yes, 1; no, 0)                                                                              |
| MMSE score (0.3 for 24–26, 0.7 for 21–23, 1 for 0–20)                                                                                 |
| Body mass index < 18.5 kg/m <sup>2</sup> (yes, 1; no, 0)                                                                              |
| Serum albumin level < 3.5 g/dL (yes, 1; no, 0)                                                                                        |
| Hand grip strength, kg (0 for ≥ 32, 0.5 for ≥ 26 and < 32, 1 for < 26 in men; 0 for ≥ 20, 0.5 for ≥ 16 and < 20, 1 for < 16 in women) |
| Usual gait speed, m/s (0 for ≥ 1, 0.3 for ≥ 0.8 and < 1, 0.7 for ≥ 0.6 and < 0.8, 1 for < 0.6)                                        |
| Chair rise test time, sec (0 for < 11.2, 0.25 for ≥ 11.2 and < 13.7, 0.5 for ≥ 13.7 and < 16.7, 0.75 for ≥ 16.7 and < 61, 1 for ≥ 61) |
| Problems in dressing (yes, 1; no, 0)                                                                                                  |
| Difficulties in washing (yes, 1; no, 0)                                                                                               |
| Difficulties in bathing (yes, 1; no, 0)                                                                                               |
| Problems in eating (yes, 1; no, 0)                                                                                                    |
| Problems in moving in home (yes, 1; no, 0)                                                                                            |
| Toileting problems (yes, 1; no, 0)                                                                                                    |
| Difficulties in using phone (yes, 1; no, 0)                                                                                           |
| Problems in buying groceries (yes, 1; no, 0)                                                                                          |
| Needs help in transportation (yes, 1; no, 0)                                                                                          |
| Needs help in managing medications (yes, 1; no, 0)                                                                                    |
| Difficulties in managing finances (yes, 1; no, 0)                                                                                     |
| Problems in preparing foods (yes, 1; no, 0)                                                                                           |
| Problems in performing basic household chores (yes, 1; no, 0)                                                                         |
| Problems in washing clothes (yes, 1; no, 0)                                                                                           |
| Difficult to perform stooping, crouching, or kneeling (yes, 1; no, 0)                                                                 |
| Difficult to lift or carry objects as heavy as 10 pounds (yes, 1; no, 0)                                                              |
| Difficult to write or handle and grasp small objects (yes, 1; no, 0)                                                                  |
| Difficult to walk for 400 m (yes, 1; no, 0)                                                                                           |
| Difficult to reach or extend arms above shoulder level (yes, 1; no, 0)                                                                |
| Help needed to do heavy work around the house (yes, 1; no, 0)                                                                         |
| Help needed to walk up and downstairs (yes, 1; no, 0)                                                                                 |
| Help needed to walk half a mile (yes, 1; no, 0)                                                                                       |

CGA-FI, comprehensive geriatric assessment-frailty index; MMSE, Mini-Mental Status Examination.
